# Supplementary material for: Basket-Type Catheters: Diagnostic Pitfalls Caused by Deformation and Limited Coverage
Source: Hindawi journal article supplement (doi:10.1155/2016/5340574), 2016-01-01
Supplement: f1 [file 5340574.f1.pdf]

## Supplemental Table T1

| Patient characteristics                |           |
|----------------------------------------|-----------|
| Age (years)                            | 61 ± 11   |
| Female (n)                             | 4 (44%)   |
| Body mass index                        | 26 ± 6    |
| Paroxysmal AF (n)                      | 2 (22%)   |
| Persistent AF (n)                      | 5 (56%)   |
| Atypical atrial flutter (n)            | 2...(22%) |
| Left atrial diameter (mm)              | 41 ± 3    |
| Left ventricular ejection fraction (%) | 64 ± 2    |
| Mild mitral regurgitation (n)          | 7 (78%)   |
| Coronary artery disease (n)            | 1 (11%)   |
| Hypertension (n)                       | 6 (67%)   |
| Diabetes mellitus (n)                  | 2 (22%)   |

Age, body mass index, left atrial diameter and left ventricular ejection fraction are given in mean and standard deviation values. The left atrial diameter was measured by echocardiography in a parasternal long axis view in end systole. All other values are given in total numbers and percentages.
