# Supplementary material for: Basket-Type Catheters: Diagnostic Pitfalls Caused by Deformation and Limited Coverage
Source: Hindawi journal article supplement (doi:10.1155/2016/5340574), 2016-01-01

# Supplemental Figure S2

Two types of basket catheters for panoramic mapping were assessed:

## Constellation

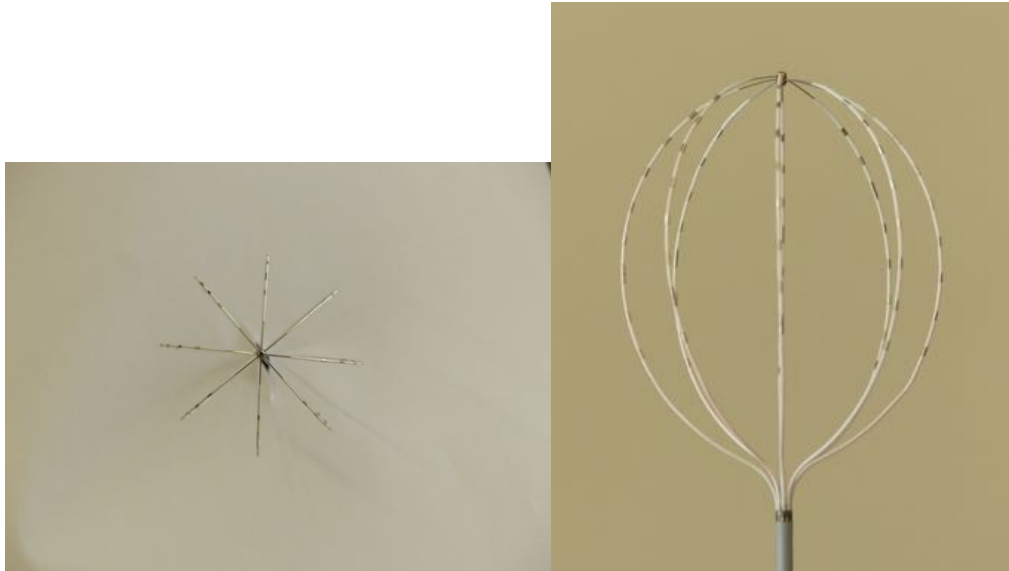

## FIRMap

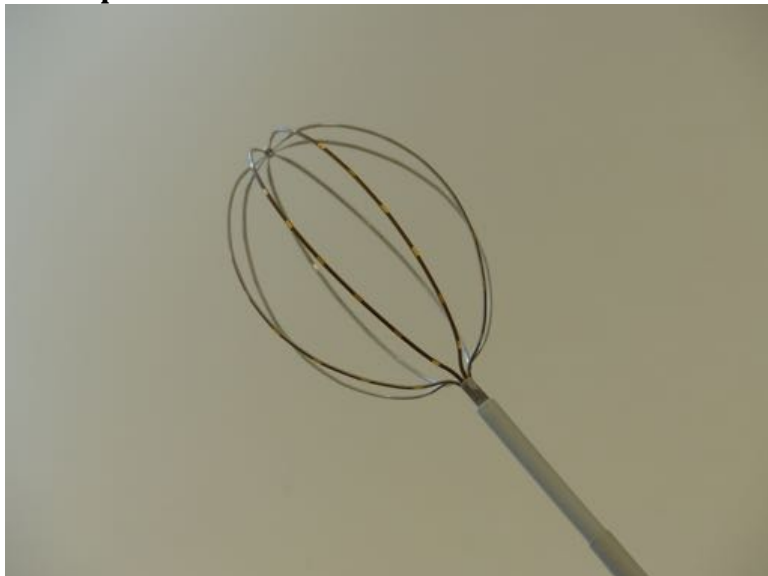

Supplement: f3 [file 5340574.f3.pdf]
